# Supplementary material for: A Pair of Dopamine Neurons Target the D1-Like Dopamine Receptor DopR in the Central Complex to Promote Ethanol-Stimulated Locomotion in Drosophila
Source: PubMed Central journal article supplement (PMC2848596; doi:10.1371/journal.pone.0009954), 2010-04-01
Supplement: pone.0009954.s001.pdf [file pone.0009954.s001.pdf]

| Experiment                                 | Fig.         | Genotype or Condition               | Speed, mm/sec (SEM)         | Statistical Test | Test Result | Post-hoc | Post-hoc Results                                                                                                                                             |                                                                                                                                                   |
|--------------------------------------------|--------------|-------------------------------------|-----------------------------|------------------|-------------|----------|--------------------------------------------------------------------------------------------------------------------------------------------------------------|---------------------------------------------------------------------------------------------------------------------------------------------------|
| Tetanus in <i>TH-GAL4</i> neurons          | 1C           | <i>TH-GAL4/+; UAS-TeTx/+</i>        | 1.80 (0.190)                | 1-way RM ANOVA   | P<0.0005    | Dunnett  | vs. <i>TH-GAL4/+; UAS-TeTx/+</i> ;<br>P<0.01<br>P<0.01<br>P<0.01<br>P<0.01                                                                                   |                                                                                                                                                   |
|                                            |              | <i>TH-GAL4/+; UAS-IMP/+</i>         | 3.55 (0.405)                |                  |             |          |                                                                                                                                                              |                                                                                                                                                   |
|                                            |              | <i>TH-GAL4/+</i>                    | 2.76 (0.324)                |                  |             |          |                                                                                                                                                              |                                                                                                                                                   |
|                                            |              | <i>UAS-TeTx/+</i>                   | 3.59 (0.349)                |                  |             |          |                                                                                                                                                              |                                                                                                                                                   |
|                                            |              | <i>UAS-IMP/+</i>                    | 2.72 (0.265)                |                  |             |          |                                                                                                                                                              |                                                                                                                                                   |
| Tetanus in <i>Ddc(HL7)-GAL4</i> neurons    | 1C           | <i>Ddc(HL7)-GAL4/+; UAS-TeTx/+</i>  | 2.39 (0.312)                | 2-sample t-test  | P=0.0026    |          |                                                                                                                                                              |                                                                                                                                                   |
|                                            |              | <i>Ddc(HL7)-GAL4/+; UAS-IMP/+</i>   | 4.34 (0.385)                |                  |             |          |                                                                                                                                                              |                                                                                                                                                   |
| Tetanus in <i>Ddc(HL5)-GAL4</i> neurons    | 1C           | <i>Ddc(HL5)-GAL4/+; UAS-TeTx/+</i>  | 5.79 (0.826)                | 2-sample t-test  | P=0.450     |          |                                                                                                                                                              |                                                                                                                                                   |
|                                            |              | <i>Ddc(HL5)-GAL4/+; UAS-IMP/+</i>   | 6.54 (0.320)                |                  |             |          |                                                                                                                                                              |                                                                                                                                                   |
| <i>DAT<sup>fmn</sup></i> hyperactivity     | SF1A         | <i>fmn/fmn</i>                      | 1.97 (0.096)                | Paired t-test    | P<0.0005    |          |                                                                                                                                                              |                                                                                                                                                   |
|                                            |              | Control                             | 3.67 (0.228)                |                  |             |          |                                                                                                                                                              |                                                                                                                                                   |
| 3IY treatment                              | SF1C         | 3IY                                 | 3.07 (0.182)                | Paired t-test    | P=0.0234    |          |                                                                                                                                                              |                                                                                                                                                   |
|                                            |              | Control                             | 3.61 (0.309)                |                  |             |          |                                                                                                                                                              |                                                                                                                                                   |
| Tetanus in <i>c346</i> neurons             | 2F           | <i>c346/Y; UAS-TeTx/+</i>           | 5.20 (0.900)                | 1-way ANOVA      | P=0.0026    | Tukey    | P<0.01 <i>c346/TeTx</i> vs. <i>c346/IMP</i><br>P<0.05 <i>c346/TeTx</i> vs. <i>c346/Y</i><br>P>0.05 <i>c346/IMP</i> vs. <i>c346/Y</i>                         |                                                                                                                                                   |
|                                            |              | <i>c346/Y; UAS-IMP/+</i>            | 8.88 (0.407)                |                  |             |          |                                                                                                                                                              |                                                                                                                                                   |
|                                            |              | <i>c346/Y</i>                       | 8.52 (0.534)                |                  |             |          |                                                                                                                                                              |                                                                                                                                                   |
| <i>DAT</i> overexpression                  | 2J,K         | <i>TH-GAL4/+; UAS-DAT/+</i>         | 4.22 (0.235)                | 2-sample t-test  | P<0.0005    |          |                                                                                                                                                              |                                                                                                                                                   |
|                                            |              | <i>TH-GAL4/+</i>                    | 2.59 (0.095)                |                  |             |          |                                                                                                                                                              |                                                                                                                                                   |
| <i>DAT</i> overexpression                  | 2J,K         | <i>c346/Y; UAS-DAT/+</i>            | 5.77 (0.203)                | 2-sample t-test  | P=0.0013    |          |                                                                                                                                                              |                                                                                                                                                   |
|                                            |              | <i>c346/Y</i>                       | 4.46 (0.293)                |                  |             |          |                                                                                                                                                              |                                                                                                                                                   |
| Tetanus in Central Complex                 | 3A           | <i>5.30/+; UAS-TeTx/+</i>           | 3.14 (0.315)                | 1-way ANOVA      | P=0.0008    | Tukey    | P<0.001 <i>5.30/TeTx</i> vs. <i>5.30/IMP</i><br>P<0.01 <i>5.30/TeTx</i> vs. <i>5.30/+</i><br>P>0.05 <i>5.30/IMP</i> vs. <i>5.30/+</i>                        |                                                                                                                                                   |
|                                            |              | <i>5.30/+; UAS-IMP/+</i>            | 6.85 (0.831)                |                  |             |          |                                                                                                                                                              |                                                                                                                                                   |
|                                            |              | <i>5.30/+</i>                       | 5.94 (0.481)                |                  |             |          |                                                                                                                                                              |                                                                                                                                                   |
|                                            |              |                                     | <i>11.148/+; UAS-TeTx/+</i> | 3.70 (0.182)     | 1-way ANOVA | P=0.0051 | Tukey                                                                                                                                                        | P<0.05 <i>11.148/TeTx</i> vs. <i>11.148/IMP</i><br>P<0.05 <i>11.148/TeTx</i> vs. <i>11.148/+</i><br>P=0.136 <i>11.148/IMP</i> vs. <i>11.148/+</i> |
|                                            |              |                                     | <i>11.148/+; UAS-IMP/+</i>  | 6.00 (0.679)     |             |          |                                                                                                                                                              |                                                                                                                                                   |
|                                            |              |                                     | <i>11.148/+</i>             | 5.86 (0.726)     |             |          |                                                                                                                                                              |                                                                                                                                                   |
|                                            |              |                                     | <i>c819/+; UAS-TeTx/+</i>   | 6.92 (0.521)     | 1-way ANOVA | P=0.0024 | Tukey                                                                                                                                                        | P<0.05 <i>c819/TeTx</i> vs. <i>c819/IMP</i><br>P<0.01 <i>c819/TeTx</i> vs. <i>c819/+</i><br>P>0.05 <i>c819/IMP</i> vs. <i>c819/+</i>              |
|                                            |              |                                     | <i>c819/+; UAS-IMP/+</i>    | 8.72 (0.279)     |             |          |                                                                                                                                                              |                                                                                                                                                   |
|                                            |              |                                     | <i>c819/+</i>               | 10.40 (0.750)    |             |          |                                                                                                                                                              |                                                                                                                                                   |
|                                            |              |                                     | <i>189Y/+; UAS-TeTx/+</i>   | 8.97 (0.325)     | 1-way ANOVA | P=0.0337 | Tukey                                                                                                                                                        | P>0.05 <i>189Y/TeTx</i> vs. <i>189Y/IMP</i><br>P<0.05 <i>189Y/TeTx</i> vs. <i>189Y/+</i><br>P<0.05 <i>189Y/IMP</i> vs. <i>189Y/+</i>              |
|                                            |              |                                     | <i>189Y/+; UAS-IMP/+</i>    | 8.45 (0.510)     |             |          |                                                                                                                                                              |                                                                                                                                                   |
|                                            |              |                                     | <i>189Y/+</i>               | 7.10 (0.631)     |             |          |                                                                                                                                                              |                                                                                                                                                   |
|                                            |              |                                     | <i>c561/Y; UAS-TeTx/+</i>   | 8.14 (0.508)     | 1-way ANOVA | P=0.0448 | Tukey                                                                                                                                                        | P>0.05 for all comparisons                                                                                                                        |
|                                            |              |                                     | <i>c561/Y; UAS-IMP/+</i>    | 8.59 (0.637)     |             |          |                                                                                                                                                              |                                                                                                                                                   |
|                                            |              |                                     | <i>c561/Y</i>               | 7.12 (0.245)     |             |          |                                                                                                                                                              |                                                                                                                                                   |
|                                            |              | <i>c232/+; UAS-TeTx/+</i>           | 8.44 (0.766)                | 1-way ANOVA      | P=0.9939    |          |                                                                                                                                                              |                                                                                                                                                   |
|                                            |              | <i>c232/+; UAS-IMP/+</i>            | 8.55 (0.450)                |                  |             |          |                                                                                                                                                              |                                                                                                                                                   |
|                                            |              | <i>c232/+</i>                       | 8.39 (1.330)                |                  |             |          |                                                                                                                                                              |                                                                                                                                                   |
| <i>DopR<sup>f02676</sup></i> hyperactivity | 5D           | <i>f02676/f02676</i>                | 2.28 (0.227)                | 1-way ANOVA      | P=0.0014    | Tukey    | P<0.001 <i>f02676/f02676</i> vs. <i>+/+</i><br>P>0.05 for others                                                                                             |                                                                                                                                                   |
|                                            |              | <i>f02676/+</i>                     | 2.99 (0.221)                |                  |             |          |                                                                                                                                                              |                                                                                                                                                   |
|                                            |              | <i>+/+</i>                          | 3.52 (0.207)                |                  |             |          |                                                                                                                                                              |                                                                                                                                                   |
| <i>f02676</i> Excision                     | 5E           | <i>f02676/f02676</i>                | 2.65 (0.232)                | 1-way RM ANOVA   | P=0.0024    | Dunnett  | vs. <i>f02676/f02676</i> ;<br>P<0.01<br>P<0.05<br>P<0.01                                                                                                     |                                                                                                                                                   |
|                                            |              | Excision 1                          | 3.49 (0.226)                |                  |             |          |                                                                                                                                                              |                                                                                                                                                   |
|                                            |              | Excision 2                          | 3.48 (0.197)                |                  |             |          |                                                                                                                                                              |                                                                                                                                                   |
|                                            |              | Control                             | 3.67 (0.228)                |                  |             |          |                                                                                                                                                              |                                                                                                                                                   |
| <i>DopR(PL00420)</i> hyperactivity         | 5F           | <i>PL00420/PL00420</i>              | 2.18 (0.222)                | 2-sample t-test  | P=0.0368    |          |                                                                                                                                                              |                                                                                                                                                   |
|                                            |              | Control                             | 2.94 (0.262)                |                  |             |          |                                                                                                                                                              |                                                                                                                                                   |
| <i>DopR</i> allelic complementation        | 5G           | <i>DfED5634/+</i>                   | 5.67 (0.302)                | 1-way ANOVA      | P<0.0005    | Dunnett  | vs. <i>DfED5634</i> ;<br>P<0.01<br>P<0.01                                                                                                                    |                                                                                                                                                   |
|                                            |              | <i>DfED5634/f02676</i>              | 2.60 (0.205)                |                  |             |          |                                                                                                                                                              |                                                                                                                                                   |
|                                            |              | <i>DfED5634/dumb1</i>               | 3.03 (0.514)                |                  |             |          |                                                                                                                                                              |                                                                                                                                                   |
| <i>DopR</i> Rescue                         | 6A           | <i>f02676/f02676</i>                | 2.67 (0.140)                | 1-way ANOVA      | P<0.0005    | Dunnett  | vs. <i>f02676/f02676</i> ;<br>P<0.05<br>P<0.05<br>P<0.01<br>P<0.01<br>P<0.01<br>P<0.01<br>P>0.05<br>P<0.01<br>P>0.05<br>P<0.01<br>P>0.05<br>P<0.01<br>P>0.05 |                                                                                                                                                   |
|                                            |              | <i>11.148/+</i>                     | 3.81 (0.260)                |                  |             |          |                                                                                                                                                              |                                                                                                                                                   |
|                                            |              | <i>11.148/+; f02676/f02676</i>      | 3.90 (0.341)                |                  |             |          |                                                                                                                                                              |                                                                                                                                                   |
|                                            |              | <i>5.30/+</i>                       | 5.37 (0.230)                |                  |             |          |                                                                                                                                                              |                                                                                                                                                   |
|                                            |              | <i>5.30/+; f02676/f02676</i>        | 4.14 (0.189)                |                  |             |          |                                                                                                                                                              |                                                                                                                                                   |
|                                            |              | <i>c232/+</i>                       | 4.51 (0.596)                |                  |             |          |                                                                                                                                                              |                                                                                                                                                   |
|                                            |              | <i>c232/+; f02676/f02676</i>        | 2.64 (0.403)                |                  |             |          |                                                                                                                                                              |                                                                                                                                                   |
|                                            |              | <i>189Y/+</i>                       | 5.48 (0.408)                |                  |             |          |                                                                                                                                                              |                                                                                                                                                   |
|                                            |              | <i>189Y/+; f02676/f02676</i>        | 3.58 (0.376)                |                  |             |          |                                                                                                                                                              |                                                                                                                                                   |
|                                            |              | <i>17d/+</i>                        | 4.20 (0.637)                |                  |             |          |                                                                                                                                                              |                                                                                                                                                   |
|                                            |              | <i>17d/+; f02676/f02676</i>         | 2.29 (0.355)                |                  |             |          |                                                                                                                                                              |                                                                                                                                                   |
|                                            |              | <i>201Y/+</i>                       | 5.40 (0.418)                |                  |             |          |                                                                                                                                                              |                                                                                                                                                   |
|                                            |              | <i>201Y/+; f02676/f02676</i>        | 2.64 (0.240)                |                  |             |          |                                                                                                                                                              |                                                                                                                                                   |
|                                            |              | <i>DopR</i> overexpression          | SF7G                        |                  |             |          |                                                                                                                                                              | <i>11.148/+; f02676/+</i>                                                                                                                         |
| <i>11.148/+</i>                            | 3.04 (0.398) |                                     |                             |                  |             |          |                                                                                                                                                              |                                                                                                                                                   |
| <i>f02676/+</i>                            | 1.95 (0.176) |                                     |                             |                  |             |          |                                                                                                                                                              |                                                                                                                                                   |
| <i>DopR</i> overexpression                 | SF7G         | <i>elav-GAL4(3E1)/+; UAS-DopR/+</i> | 3.76 (0.618)                | 1-way RM ANOVA   | P=0.2416    |          |                                                                                                                                                              |                                                                                                                                                   |
|                                            |              | <i>elav-GAL4(3E1)/+</i>             | 3.70 (0.340)                |                  |             |          |                                                                                                                                                              |                                                                                                                                                   |
|                                            |              | <i>UAS-DopR/+</i>                   | 3.20 (0.553)                |                  |             |          |                                                                                                                                                              |                                                                                                                                                   |
